# Supplementary material for: NCBI’s Virus Discovery Hackathon: Engaging Research Communities to Identify Cloud Infrastructure Requirements
Source: PubMed Central journal article supplement (PMC6771016; doi:10.3390/genes10090714), 2019-09-16
Supplement: genes-10-00714-s001.pdf [file genes-10-00714-s001.pdf]

## Supplemental Tables

Supplemental Table 1

| Tool                  | Version             |
|-----------------------|---------------------|
| BLAST                 |                     |
| BLAST databases       |                     |
| SRA toolkit           | 2.9.4 (pre-release) |
| HISAT2                | 2.9.2               |
| SEKSA                 | 2.2                 |
| guidedassembler_graph | v2.0                |
| compute_coverage      | 2.9.0               |
| Python                | 2.7.15+ / 3.6.7     |
| C++                   | 6.3.0               |
| R                     | 3.3.3               |
| Anaconda2             | 1.7.2               |
| Conda                 | 4.5.11              |
| Bedtools              | 2.26.0              |
| GATK                  | 3.8-1-0             |
| Picard                | 2.8.17              |
| BWA                   | 0.7.17              |
| MiniMap2              | 2.14                |
| Bowtie2               | 2.3.0               |
| EDirect               | N/A                 |
| HMMER                 | N/A                 |
| Samtools              | 1.9                 |
| BCFTools              | 1.9                 |
| HTS JDK               | ≥ 2.18.0            |
| HTS lib               | 1.9                 |
| STAR                  | 2.6.0               |
| Abyss                 | ≥ 2.0.2             |
| plink-ng              | v2.0                |
| Cufflinks             | 2.2.1               |
| Cytoscape-impl        | 3.7.0               |
| Velvet                | 1.2.10              |
| Tophat                | 2.1.1               |
| FastQC                | 0.11.8              |
| HTSeq                 | ≥ 0.11.0            |
| mcl                   | ≥ 14-137            |
| MUSCLE                | ≥ v3.8.31           |
| MrBayes               | 3.2.6               |

|                     |          |
|---------------------|----------|
| GARLI               | ≥ 2.1    |
| Clustal omega       | 1.2.4    |
| Dedupe              | ≥ 1.9.4  |
| TrinityRNASeq       | 2.8.4    |
| Jupyter             | 4.4.0    |
| Bioconductor-deseq2 | ≥ 1.20.0 |
| jModelTest          | N/A      |
| IGV                 | N/A      |

**Supplemental Table Legends**

Supplemental Table 1: Pre-installed tools. NCBI staff prepared a VM image using GCP tool, such that the listed tool were pre-installed.
